# Supplementary material for: A red emitting two-photon fluorescent probe for dynamic imaging of redox balance meditated by a superoxide anion and GSH in living cells and tissues
Source: Royal Society of Chemistry journal article supplement (doi:10.1039/c6an01178k), 2016-01-01
Supplement: c6an01178k1.pdf [file c6an01178k1.pdf]

***Supporting Information for***

**Red emitting two-photon fluorescent probe for dynamic imaging of redox balance mediated by superoxide anion and GSH in living cells and tissues**

*Hong-Wen Liu, Xiaoyan Zhu, Jing Zhang, Xiao-Bing Zhang\* and Weihong Tan*

*Molecular Science and Biomedicine Laboratory, State Key Laboratory of Chemo/Biosensing and Chemometrics, College of Chemistry and Chemical Engineering, Hunan University, Changsha 410082, China.*

\* To whom correspondence should be addressed.

E-mail: [xbzhang@hnu.edu.cn](mailto:xbzhang@hnu.edu.cn).

## Table of contents

|                                                                         |            |
|-------------------------------------------------------------------------|------------|
| <b>Synthesis of probe NpRbH .....</b>                                   | <b>S3</b>  |
| <b>Cell cytotoxic assays and two-photon fluorescence imaging.....</b>   | <b>S3</b>  |
| <b>Two-photon fluorescence imaging of fresh mouse liver slices.....</b> | <b>S4</b>  |
| <b>Figure S2.....</b>                                                   | <b>S4</b>  |
| <b>Figure S3-4.....</b>                                                 | <b>S5</b>  |
| <b>Figure S5-6.....</b>                                                 | <b>S6</b>  |
| <b>Figure S7-9.....</b>                                                 | <b>S7</b>  |
| <b>Figure S10-12.....</b>                                               | <b>S8</b>  |
| <b>Figure S13.....</b>                                                  | <b>S9</b>  |
| <b>References.....</b>                                                  | <b>S9</b>  |
| <b>NMR spectrum and MS of all the new compounds.....</b>                | <b>S10</b> |

## Synthesis and the response mechanism of the probe

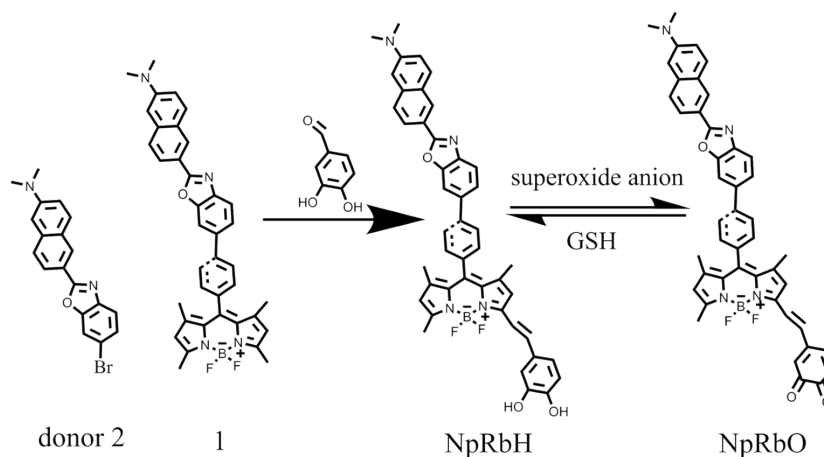

**Fig. S1.** Structures and synthetic route of probe **NpRbH** and the response mechanism of probe **NpRbH**.

### Synthesis of probe **NpRbH**

Compound **1** and donor **2** was synthesized according to our previous work<sup>1,2</sup>. Compound **1** (305 mg, 0.5 mmol), 3,4-dihydroxy-benzaldehyde (70 mg, 0.5 mmol), glacial acetic acid (0.2mL) and piperidine (1 mL) was dissolved in dry toluene (100 mL) in a Dean-Stark apparatus and then refluxed for 12 h. The solvent was concentrated under reduced pressure. The residue was purified by the silica gel chromatography (dichloromethane /ethyl acetate, 20:1, v/v), which gave compound **NpRbH** as a dark-purple solid (36mg, 8%). <sup>1</sup>HNMR (DMSO-d<sub>6</sub>, 400 MHz)  $\delta$  (ppm):  $\delta$  9.49 (s, 1H), 9.36 (s, 1H), 8.63 (s, 1H), 8.23 (s, 1H), 8.12 (d,  $J = 8.11$ , 1H), 8.03 (m,  $J = 8.01$ , 3H), 7.88(m,  $J = 7.86$ , 3H), 7.55(d,  $J = 7.54$ , 2H), 7.46(d,  $J = 7.44$ , 2H), 7.35 (m,  $J = 7.31$ , 2H), 7.11 (s, 1H), 7.03 (s, 1H), 6.96 (s, 1H), 6.91 (d,  $J = 6.90$ , 1H), 6.81 (d,  $J = 6.80$ , 1H), 6.20 (s, 1H), 3.10 (s, 6H), 1.99 (s, 3H), 1.52 (s, 3H), 1.47 (s, 3H). MS (ESI):  $m/z$  729.3 [M-H]<sup>-</sup>, calcd for C<sub>45</sub>H<sub>37</sub>BF<sub>2</sub>N<sub>4</sub>O<sub>3</sub> 730.6.

### Cell cytotoxic assays and two-photon fluorescence imaging

To evaluate the potential cytotoxicity of probe **NpRbH**, HeLa cells were seeded at  $1 \times 10^5$  cells per well in 96-well plates and incubated for 24 h and 48 h. After that different concentration (2-20  $\mu$ M) of probe **NpRbH** was added to the cells and these cells were cultured for an additional 24 h or 48 h. And then the cytotoxic effects of **NpRbH** was

determined using MTT assays. Following incubation, the RAW264.7 cells were washed three times with Dulbecco's phosphate buffered saline (DPBS) and imaged. The two-photon excitation wavelength of the femtosecond laser was fixed at 780 nm; the emission wavelengths were recorded at 470-530 and 550-650 nm respectively.

### Two-photon fluorescence imaging of fresh mouse liver slices

Fresh tissue slices were prepared from the livers of nude mice. The slices were incubated with analytes at 37 °C. The slices were washed with DPBS three times, and then two-photon fluorescence microscopy images were collected. The excitation wavelength of the femtosecond laser was set at 780 nm, the emission wavelengths were recorded at 470-530 and 550-650 nm, respectively.

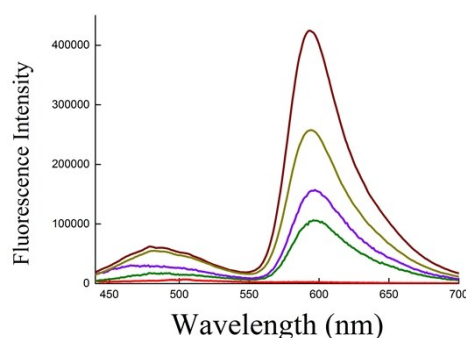

**Fig. S2.** Fluorescence emission spectra. The fluorescence performance of **NpRbH** in the different organic phase ratio. **NpRbH** (5  $\mu\text{M}$ ) in PBS/EtOH (containing EtOH 10, 15, 20, 30%, pH= 7.4, 10 mM).  $\lambda_{\text{ex}} = 400$  nm.

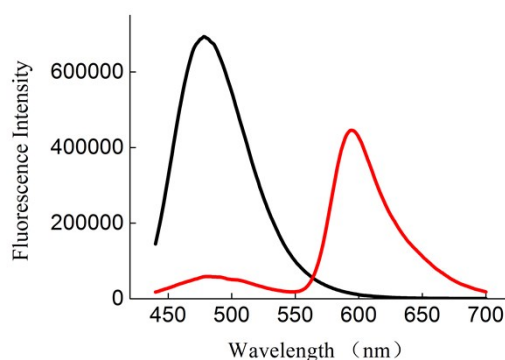

**Fig. S3.** Fluorescence emission spectra. The black and red lines represent donor **2** (5  $\mu\text{M}$ ), and **NpRbH** (5  $\mu\text{M}$ ) respectively, in PBS/EtOH (3/1, v/v, pH= 7.4, 10 mM), as the respective fluorescence responses;  $\lambda_{\text{ex}} = 400$  nm.

**Energy Transfer Efficiency (ETE)** = [(fluorescence of donor-fluorescence of donor in cassette)/fluorescence of donor]  $\times$  100%.<sup>1,2</sup>

For **NpRbH**, ETE=(692056 -59734)/ 692056  $\times$  100% = 91.37%.

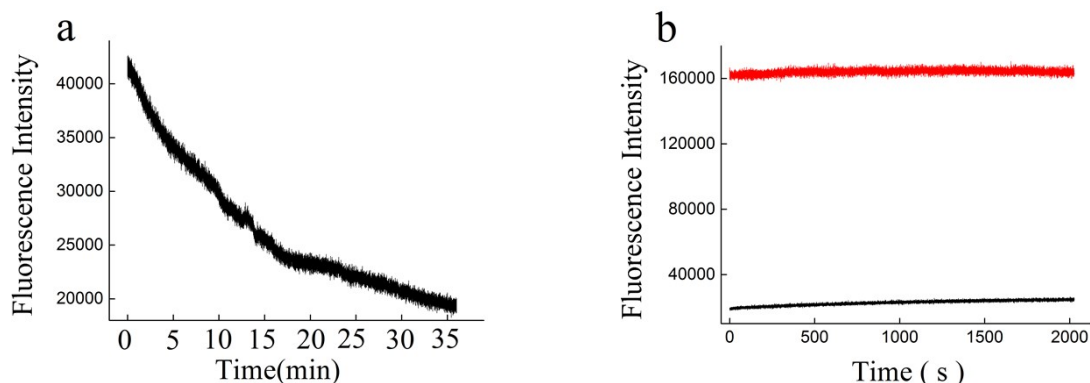

**Fig. S4.** (a) Time course of fluorescence change in detecting superoxide with **NpRbH**. (b) Photostability experiment of **NpRbH** before (red line) and after (black line) added  $O_2^{\bullet-}$ . In PBS/EtOH (3/1, v/v, pH= 7.4, 10 mM), as the respective fluorescence responses;  $\lambda_{ex}$  = 400 nm,  $\lambda_{em}$ = 596 nm.

**Fluorescence titration and detection limit:** The detection limit was determined from the fluorescence titration data. The fluorescence intensity increased linearly with the concentration of  $O_2^{\bullet-}$  ranging from 0.33  $\mu$ M to 4.0  $\mu$ M. The detection limit was calculated to be  $9.51 \times 10^{-8}$  M based on  $3\sigma/\text{slope}$  method.

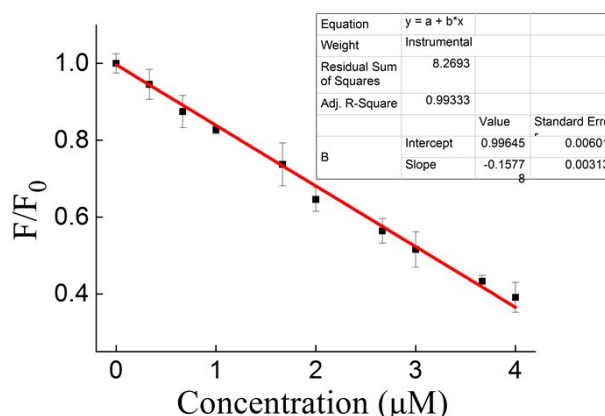

**Fig. S5** The linear responses at low  $O_2^{\bullet-}$  concentrations (0-4  $\mu$ M).  $\lambda_{ex}$  = 400 nm.

## The reversibility of NpRbH

The proposed reaction mechanism of **NpRbH** with  $O_2^{\cdot-}$  was shown in **Figure S1**. The structure of **NpRbO** was confirmed by MS (ESI):  $m/z$  729.5  $[M+H]^+$ , calcd 728.3. The fluorescence responses of **NpRbH** to different concentrations of GSH were showed in **Figure S5**. The fluorescence of **NpRbH** increases gradually with the increase of GSH concentrations, until the  $[GSH]$  reaches 2 mM. So 1.5 mM GSH was used to convert **NpRbH** into **NpRbO** in the reversible cycle experiment. The reversibility of the probe was tested (Figure S6). This reversible cycle can be repeated for three times more under the same conditions. The reversibility implied the advantage of **NpRbH** for dynamic determine  $O_2^{\cdot-}$  in cells and in vivo.

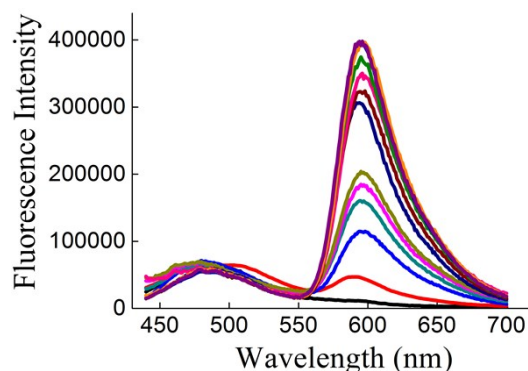

**Fig. S6.** The fluorescence emission spectra of **NpRbO** (5  $\mu$ M) in the presence of different concentrations of GSH (0, 0.1, 0.2, 0.3, 0.4, 0.5, 0.6, 0.7, 0.8, 0.9, 1, 1.5, 2 mM) in PBS buffered (10mM, pH=7.4) aqueous EtOH solution (3:1, v/v).  $\lambda_{ex}$  = 400 nm.

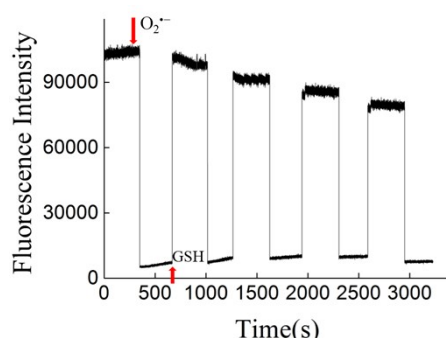

**Fig. S7.** The reversibility test of **NpRbH** for detection  $O_2^{\cdot-}$  and GSH. **NpRbH** was added with 25  $\mu$ M  $O_2^{\cdot-}$ , after 10 min, the solution was treated with 1 mM GSH. When the fluorescence returned to the baseline level, another 25  $\mu$ M  $O_2^{\cdot-}$  was added to the mixture after 10 min.  $\lambda_{ex}$  = 400 nm,  $\lambda_{em}$  = 596 nm.

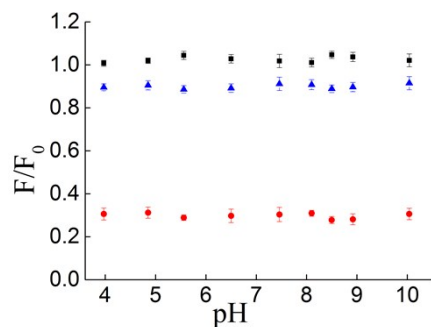

**Fig. S8.** Effect of pH on the fluorescence intensity of **NpRbH** (5  $\mu\text{M}$ ) in buffered/EtOH (3/1, v/v, pH= 4-9, 10 mM). Fluorescence responses are shown before (■), after (●) addition of  $\text{O}_2^{\bullet-}$  (25  $\mu\text{M}$ ) and further addition of GSH (1mM) (▲), respectively. Where  $F_0$  represents the fluorescence intensity of **NpRbH** (5  $\mu\text{M}$ ), the curve was plotted with the fluorescence intensity at 596 nm vs pH value.  $\lambda_{\text{ex}} = 400 \text{ nm}$ .

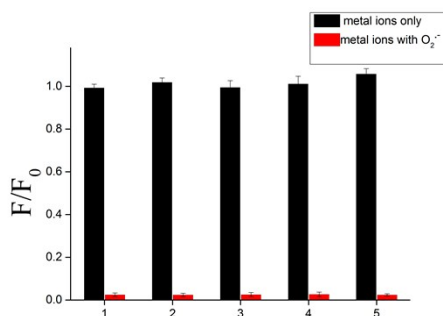

**Fig. S9.** Fluorescence responses of 5  $\mu\text{M}$  **NpRbH** to various metal ions. The fluorescence intensity at  $\lambda_{\text{em}}=596 \text{ nm}$  was plotted versus substances: 1-10.  $\text{Mn}^{2+}$ ,  $\text{Cu}^{2+}$ ,  $\text{Zn}^{2+}$ ,  $\text{Mg}^{2+}$ ,  $\text{Ca}^{2+}$  (500  $\mu\text{M}$ ),  $\text{O}_2^{\bullet-}$  (25 $\mu\text{M}$ ). Data were acquired in buffered/EtOH (3/1, v/v, pH= 7.4, 10 mM), with  $\lambda_{\text{ex}} = 400 \text{ nm}$ .

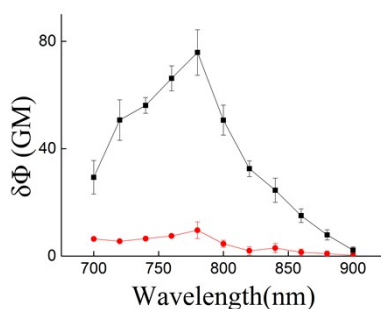

**Fig. S10** TP absorption cross-section of **NpRbH** and **NpRbO** in PBS buffered (10 mM, pH = 7.4) aqueous EtOH solution (3:1, v/v). Black line represents the active absorption cross-section of **NpRbH** and red line represents the active absorption cross-section of **NpRbO**.

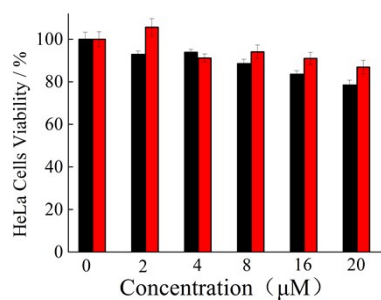

**Fig. S11.** Cytotoxicity of both **NpRbH** against HeLa cells as determined by MTT assay: HeLa cells were treated with **NpRbH** (0-20  $\mu\text{M}$ ). Black bar and red bar represents incubation for 48 h and 24 h respectively.

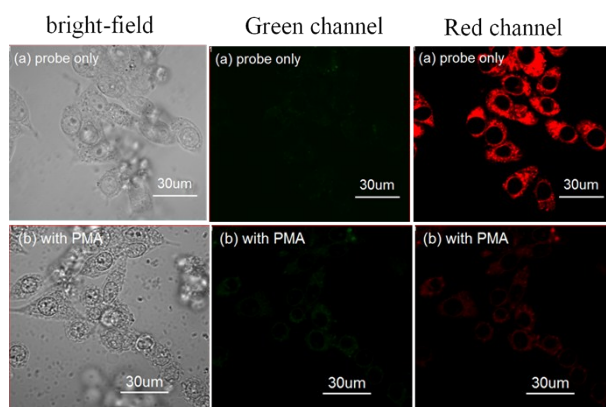

**Fig. S12.** TP fluorescence images of  $\text{O}_2^{\bullet-}/\text{GSH}$  reversible cycles in live RAW264.7 cells with **NpRbH** (2.5  $\mu\text{M}$ ). (a) Cells incubated with only probe **NpRbH** for 30 min.; (b) Cells were pretreated with PMA (5.0  $\mu\text{g}/\text{mL}$ ) for 30 min. Green channel  $\lambda_{\text{em}}=470\text{-}530$  nm, red channel  $\lambda_{\text{em}}=550\text{-}650$  nm. The results demonstrated that fluorescence signal coming from the donor remained very weak in the green channel due to the effective TBET process of the probe<sup>2</sup>.



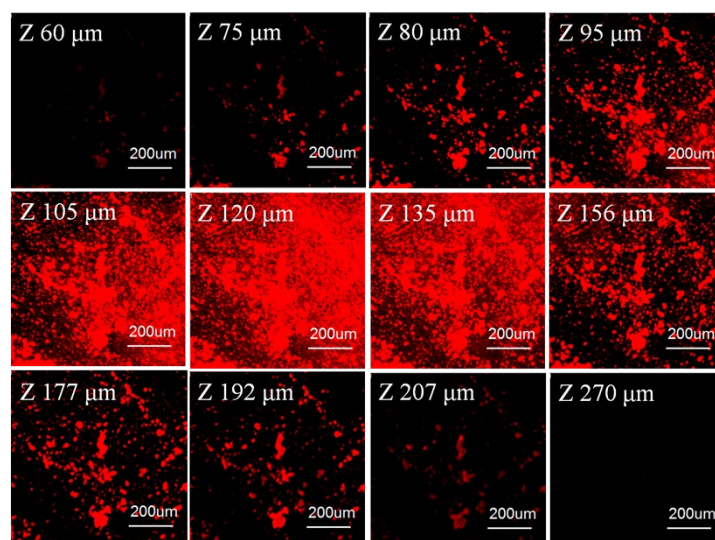

(a)

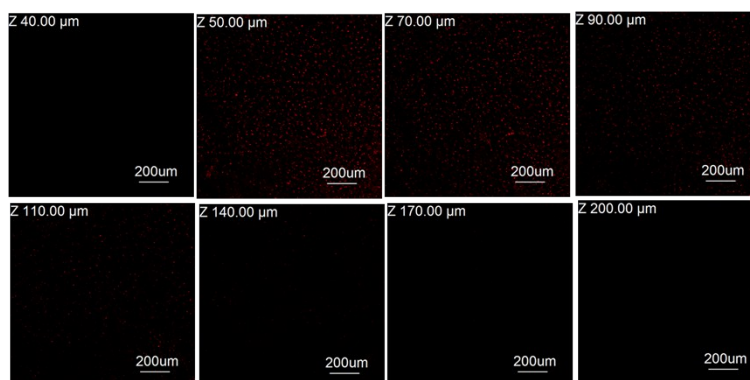

(b)

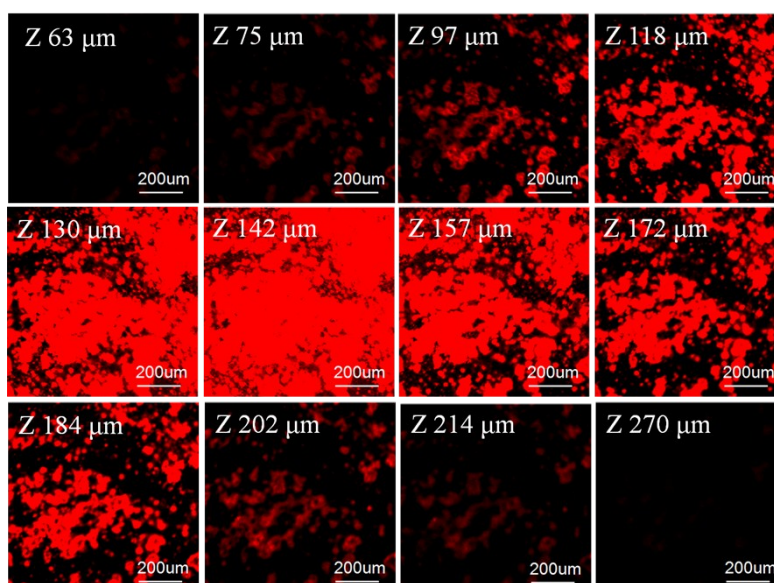

(c)

**Fig. S13.** Depth TP fluorescence images of: (a) **NpRbH** (5  $\mu\text{M}$ ) in tissues (0-300  $\mu\text{m}$ ).; (b) After added PMA (5  $\mu\text{g/mL}$ ) in tissues (0-300  $\mu\text{m}$ ) and (c) After treatment with PMA, flowed

with GSH (1mM) for another 60 min in tissues (0-300  $\mu\text{m}$ ). Step size: 3  $\mu\text{m}$  for a, c and 2  $\mu\text{m}$  for b. Scale bars: 200  $\mu\text{m}$ .  $\lambda_{\text{ex}}=780\text{nm}$ , red channel  $\lambda_{\text{em}}=550\text{-}650\text{ nm}$ .

## References

1. H.-W. Liu, X.-B. Zhang, J. Zhang, Q.-Q. Wang, X.-X. Hu, P. Wang and W. Tan, *Anal. Chem.*, 2015, **87**, 8896-8903.
2. L. Zhou, X. Zhang, Q. Wang, Y. Lv, G. Mao, A. Luo, Y. Wu, Y. Wu, J. Zhang and W. Tan, *J. Am. Chem. Soc.*, 2014, **136**, 9838-9841.

## Mass Spectra and $^1\text{H}$ NMR

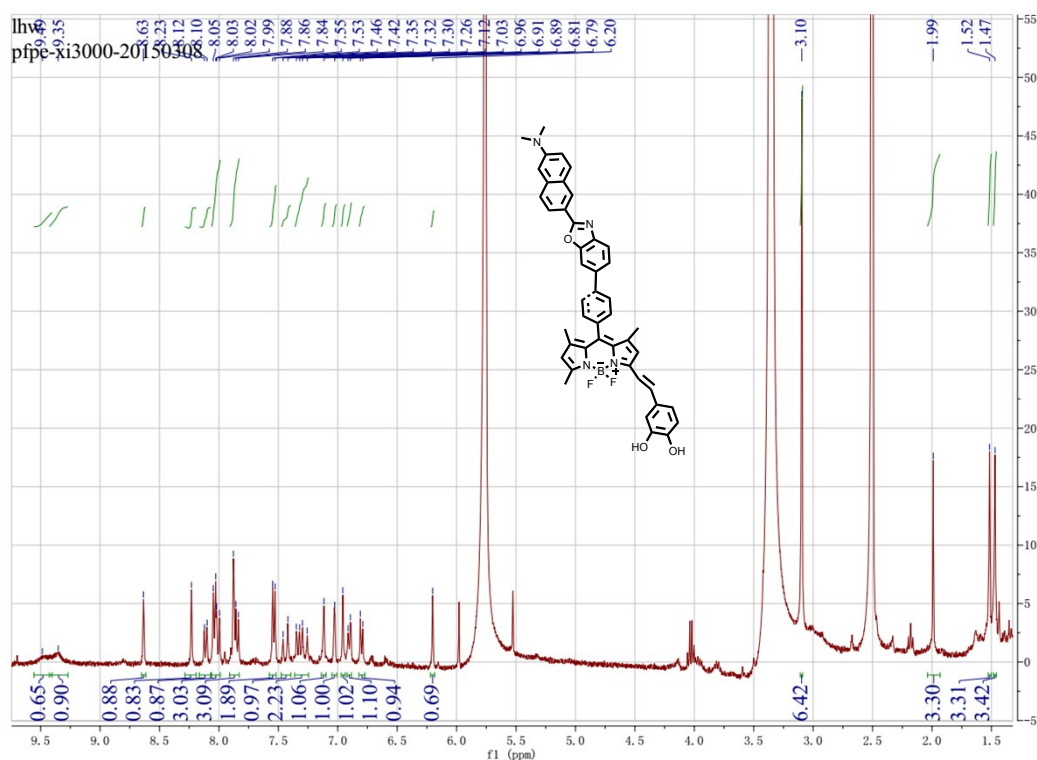

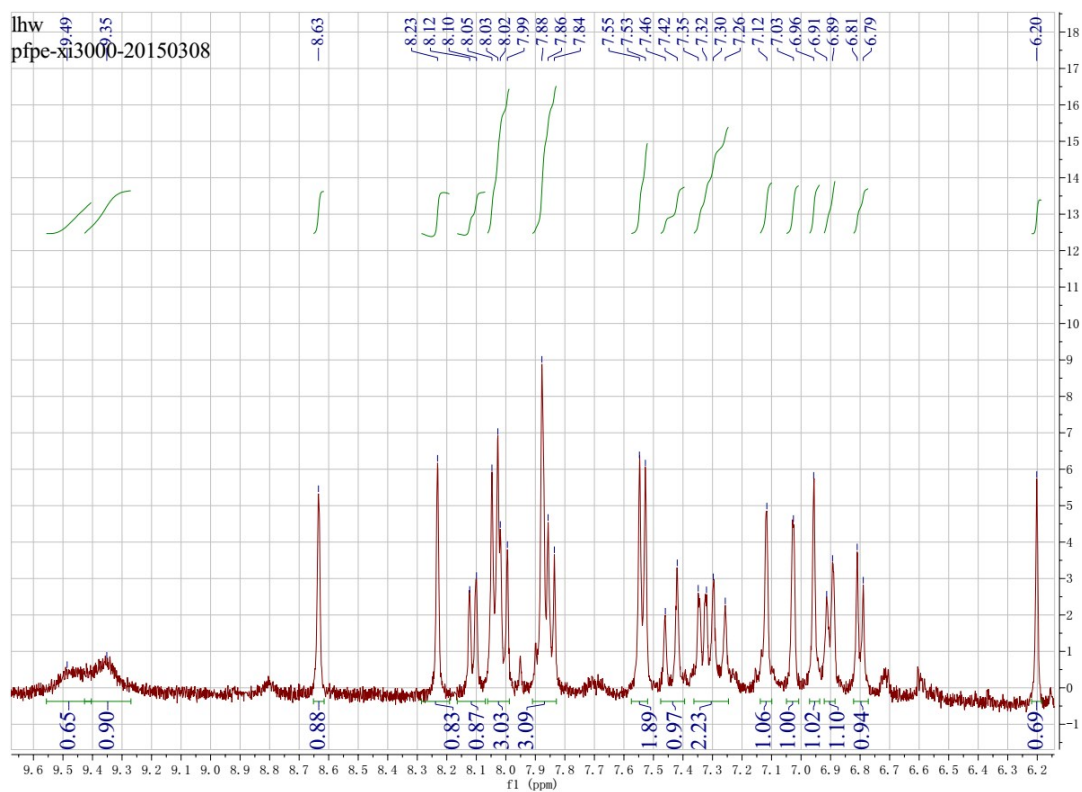

**Fig. S14**  $^1\text{H}$ NMR spectrum of the compound **NpRbH**

lhw-150515-730-h #18 RT: 0.50 AV: 1 NL: 5.60E5  
T: - c ESI ms [50.00-1500.00]

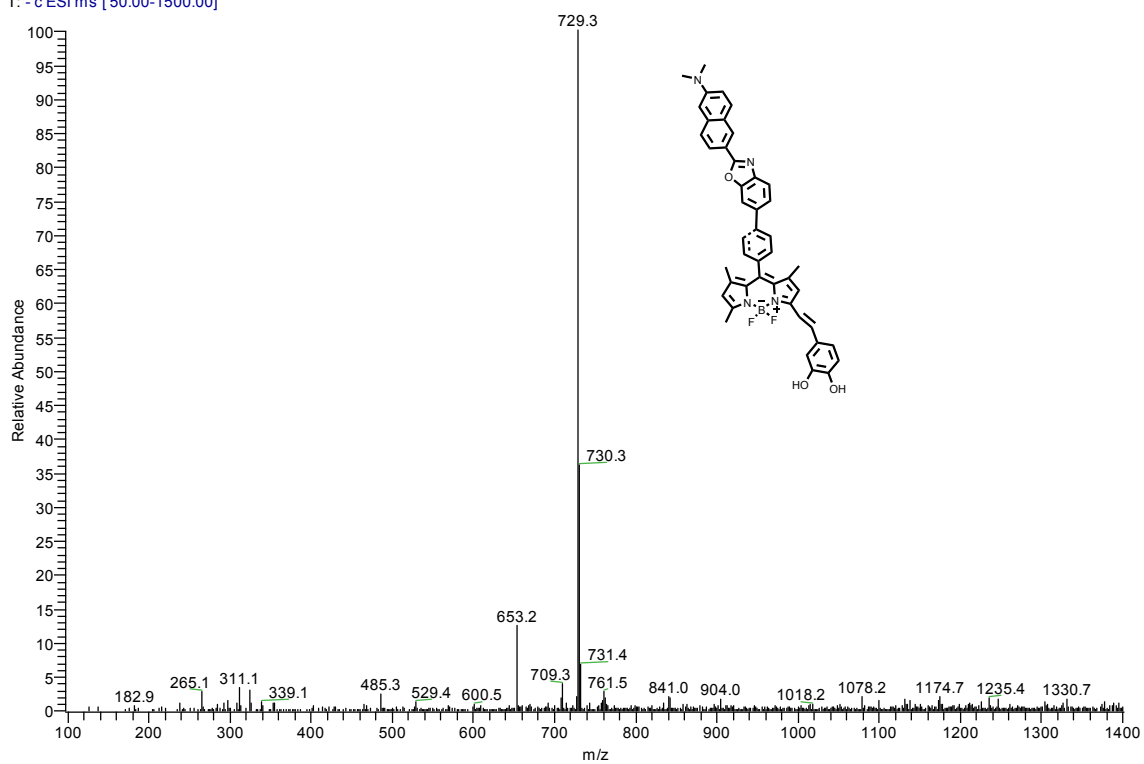

**Fig. S15** ESI mass spectrum of the compound **NpRbH**.

lhv-150930-706-h #1 RT: 0.03 AV: 1 NL: 1.14E7  
T: + c ESI Full ms [ 50.00-1500.00]

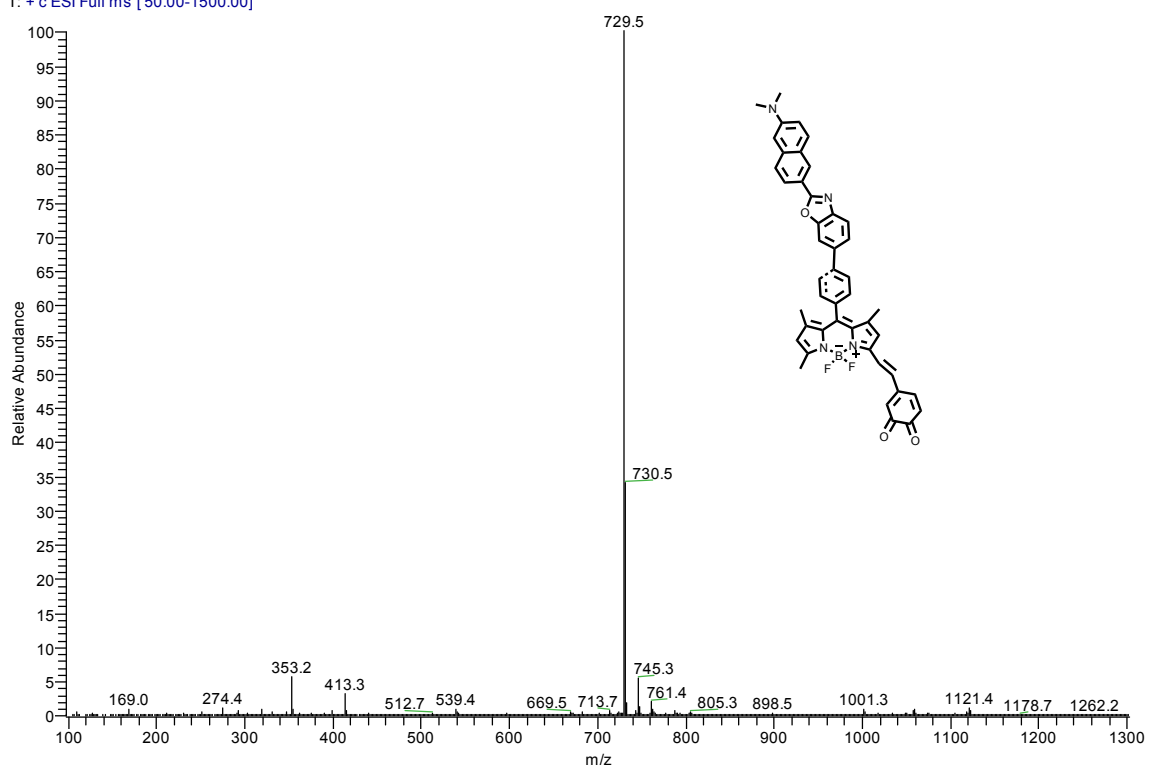

**Fig. S16** ESI mass spectrum of the compound **NpRbO**.
